# Supplementary material for: Trends and events through seven centuries: the history of a wetland landscape in the Czech Republic
Source: Springer Nature journal article supplement (doi:10.1007/s10113-016-1033-0), 2016-08-23
Supplement: 10113_2016_1033_MOESM1_ESM.pdf [file 10113_2016_1033_MOESM1_ESM.pdf]

## Online Resource 1

Stratigraphy and description of sediment deposits in Dúbrava Wood profiles. Components: As – clay, Gg(min) – sand, Th – herbaceous peat, Tl – woody peat, [A] – charcoal.

| Depth (cm)  | Troels-Smith system | Description                                                               |
|-------------|---------------------|---------------------------------------------------------------------------|
| <b>MS3</b>  |                     |                                                                           |
| 34-36       | As2Gg(min)2         | Dark-grey-brown clay sediment with sand                                   |
| 34-20       | As1Gg(min)1Th1[A]   | Dark-brown clay sediment with admixture of sand, peat and woody particles |
| 20-12       | As1 Th2Gg(min)+     | Dark-brown organic sediment with admixture of clay, small amount of sand  |
| 12-0        | Th4                 | Dark-brown undecomposed peat with roots                                   |
| <b>MS4</b>  |                     |                                                                           |
| 36-40       | As2Gg(min)2         | Dark-grey-brown clay sediment with sand                                   |
| 28-36       | As2Th1 Gg(min)+[A]  | Dark-brown clay sediment with admixture of sand, peat and charcoal        |
| 12-28       | As1Th2A             | Dark-brown peat sediment with admixture of clay and charcoal              |
| 0-12        | Th4                 | Dark-brown peat sediment with admixture of clay and charcoal              |
| <b>MS15</b> |                     |                                                                           |
| 30-40       | As2Gg(min)2         | Dark-grey-brown clay sediment with sand                                   |
| 20-30       | As1Gg(min)2Th+      | Dark-brown clay sediment with admixture of sand, peat and charcoal        |
| 12-20       | As1Gg(min)+Th1      | Dark-brown clay sediment with admixture of peat and small amount of sand  |
| 12-0        | Th4[A]              | Dark-brown undecomposed peat sediment                                     |
