# Supplementary material for: Trends and events through seven centuries: the history of a wetland landscape in the Czech Republic
Source: Springer Nature journal article supplement (doi:10.1007/s10113-016-1033-0), 2016-08-23
Supplement: 10113_2016_1033_MOESM2_ESM.pdf [file 10113_2016_1033_MOESM2_ESM.pdf]

## Online Resource 2

Results of radiocarbon AMS and  $^{210}\text{Pb}$  dating

|      | Samples<br>(lab. code) | Depth<br>(cm) | $^{14}\text{C}$ age<br>(uncal<br>BP) | Calibrated $^{14}\text{C}$ age<br>(cal BC/AD)<br>(95,4% c.i.) | Mean<br>calibrated<br>age | Material           |
|------|------------------------|---------------|--------------------------------------|---------------------------------------------------------------|---------------------------|--------------------|
| MS15 | UG-13654               | 38-40         | 280±30                               | AD 1523-1660                                                  | 1592 AD                   | seeds              |
|      | UG-12666               | 28-30         | 240±25                               | AD 1647-1795                                                  | 1706 AD                   | seeds              |
| MS3  | UG-7744                | 34 – 32       | 610 ± 25                             | 1297 AD – 1402<br>AD                                          | 1347 AD                   | seeds              |
|      | UG-7743*               | 14 – 12       | 170 ± 20                             | 1665 AD – 1919<br>AD                                          | 1786 AD                   | seeds              |
| MS 4 | UG-7747                | 35 – 33       | 560 ± 25                             | 1311 AD – 1425<br>AD                                          | 1369 AD                   | seeds,<br>charcoal |
|      | UG-7746*               | 17 – 15       | 120 ± 25                             | 1680 AD – 1939<br>AD                                          | 1815 AD                   | seeds              |

Results of radiocarbon AMS dating of the MS3, MS4 and MS15 profiles. Abbreviations: uncal. BP = uncalibrated years Before Present (1950); BC = Before Christ; AD = Anno Domini. \*UG-7743 and \*UG-7746 were excluded from the depth age model because the same layers were more precisely dated with  $^{210}\text{Pb}$ .

|          | ID    | Depth (cm) | $^{210}\text{Pb}$ [Bq/kg] | Age (AD) | Uncertainty<br>Age |
|----------|-------|------------|---------------------------|----------|--------------------|
| MS<br>15 | Pb8   | 0-2        | 33,412                    | 2011     | 3,5                |
|          | Pb7   | 2-4        | 25,591                    | 2009     | 3,5                |
|          | Pb6   | 4-6        | 21,059                    | 2001     | 3,9                |
|          | Pb5   | 6-8        | 20,160                    | 1991     | 4,3                |
|          | Pb4   | 8-10       | 19,773                    | 1978     | 5,4                |
|          | Pb3   | 10-12      | 19,154                    | 1962     | 7,0                |
|          | Pb2   | 12-14      | 14,932                    | 1937     | 9,5                |
|          | Pb1   | 14-16      | 11,319                    | 1907     | 10,2               |
| MS<br>3  | Pb16  | modern     | 202                       | 2009     | 4                  |
|          | Pb15  | 5-6        | 180                       | 2006     | 4                  |
|          | Pb14  | 6-7        | 188                       | 2001     | 4                  |
|          | Pb13  | 7-8        | 164                       | 1996     | 4                  |
|          | Pb12  | 8-9        | 117,8                     | 1989     | 4                  |
|          | Pb11  | 9-10       | 97,69                     | 1985     | 5                  |
|          | Pb10  | 11-12      | 88                        | 1976     | 5                  |
|          | Pb9   | 13-14      | 62,88                     | 1966     | 6                  |
|          | Pb8   | 15-16      | 58                        | 1959     | 6                  |
|          | Pb7   | 16-17      | 65,03                     | 1955     | 7                  |
|          | Pb6   | 18-19      | 59                        | 1942     | 7                  |
| Pb5      | 19-20 | 48,21      | 1934                      | 8        |                    |

|    | ID   | Depth (cm) | $^{210}\text{Pb}$ [Bq/kg] | Age (AD) | Uncertainty Age |
|----|------|------------|---------------------------|----------|-----------------|
|    | Pb3  | 22-23      | 41,11                     | 1899     | 12              |
|    | Pb2  | 24-25      | 33                        | 1872     | 15              |
|    | Pb1  | 26-27      | 34                        | 1840     | 18              |
| MS | Pb19 | modern     | 188                       | 2006     | 4               |
| 4  | Pb18 | 6-7        | 105                       | 2001     | 4               |
|    | Pb17 | 7-8        | 79                        | 1994     | 4               |
|    | Pb16 | 8-9        | 62                        | 1989     | 4               |
|    | Pb15 | 9-10       | 51                        | 1985     | 5               |
|    | Pb14 | 10-11      | 49                        | 1982     | 5               |
|    | Pb13 | 11-12      | 42                        | 1979     | 5               |
|    | Pb12 | 12-13      | 44                        | 1977     | 5               |
|    | Pb11 | 13-14      | 41                        | 1974     | 5               |
|    | Pb10 | 14-15      | 49                        | 1972     | 5               |
|    | Pb9  | 16-17      | 45                        | 1964     | 7               |
|    | Pb8  | 17-18      | 39                        | 1959     | 7               |
|    | Pb7  | 18-19      | 50                        | 1956     | 7               |
|    | Pb6  | 20-21      | 38                        | 1942     | 7               |
|    | Pb5  | 22-23      | 39                        | 1930     | 9               |
|    | Pb4  | 23-24      | 34                        | 1921     | 10              |
|    | Pb3  | 24-25      | 36                        | 1915     | 10              |
|    | Pb2  | 26-27      | 36                        | 1889     | 14              |
|    | Pb1  | 27-28      | 33                        | 1859     | 17              |

Results of  $^{210}\text{Pb}$  dating of the MS3, MS4 and MS15 profiles.
