# Supplementary figures and images for: Trends and events through seven centuries: the history of a wetland landscape in the Czech Republic
Source: Springer Nature journal article supplement (doi:10.1007/s10113-016-1033-0), 2016-08-23

**Online Resource 3**  
**Depth-age models**

**MS3**

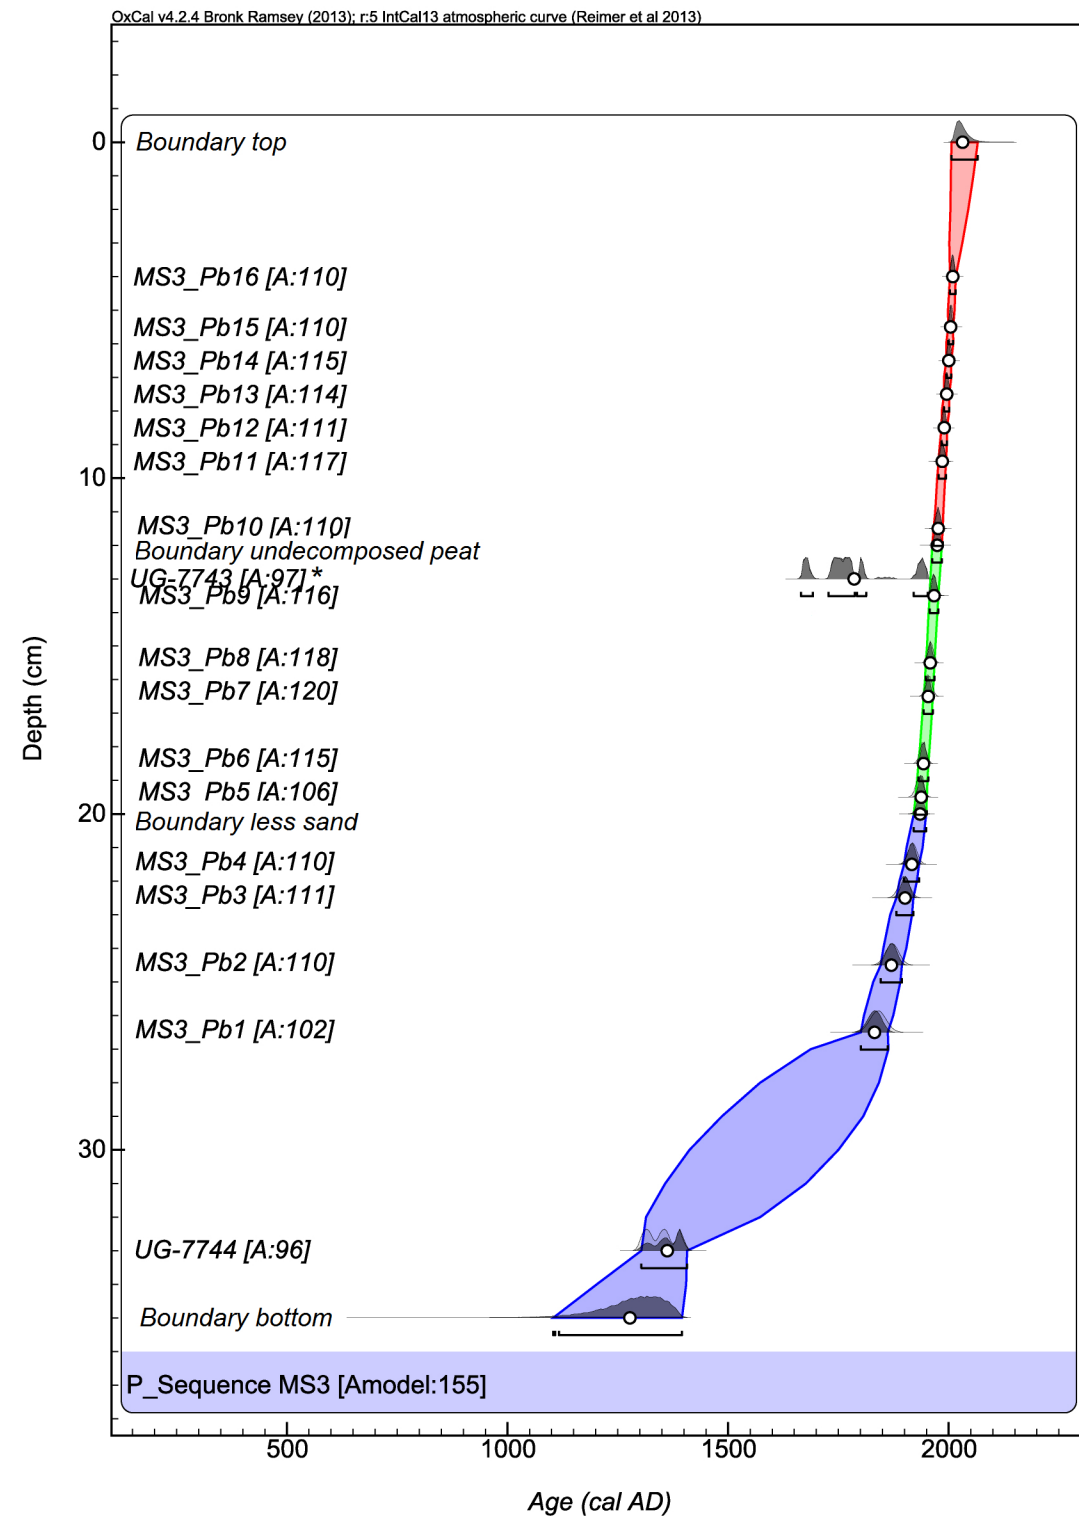

**MS4**

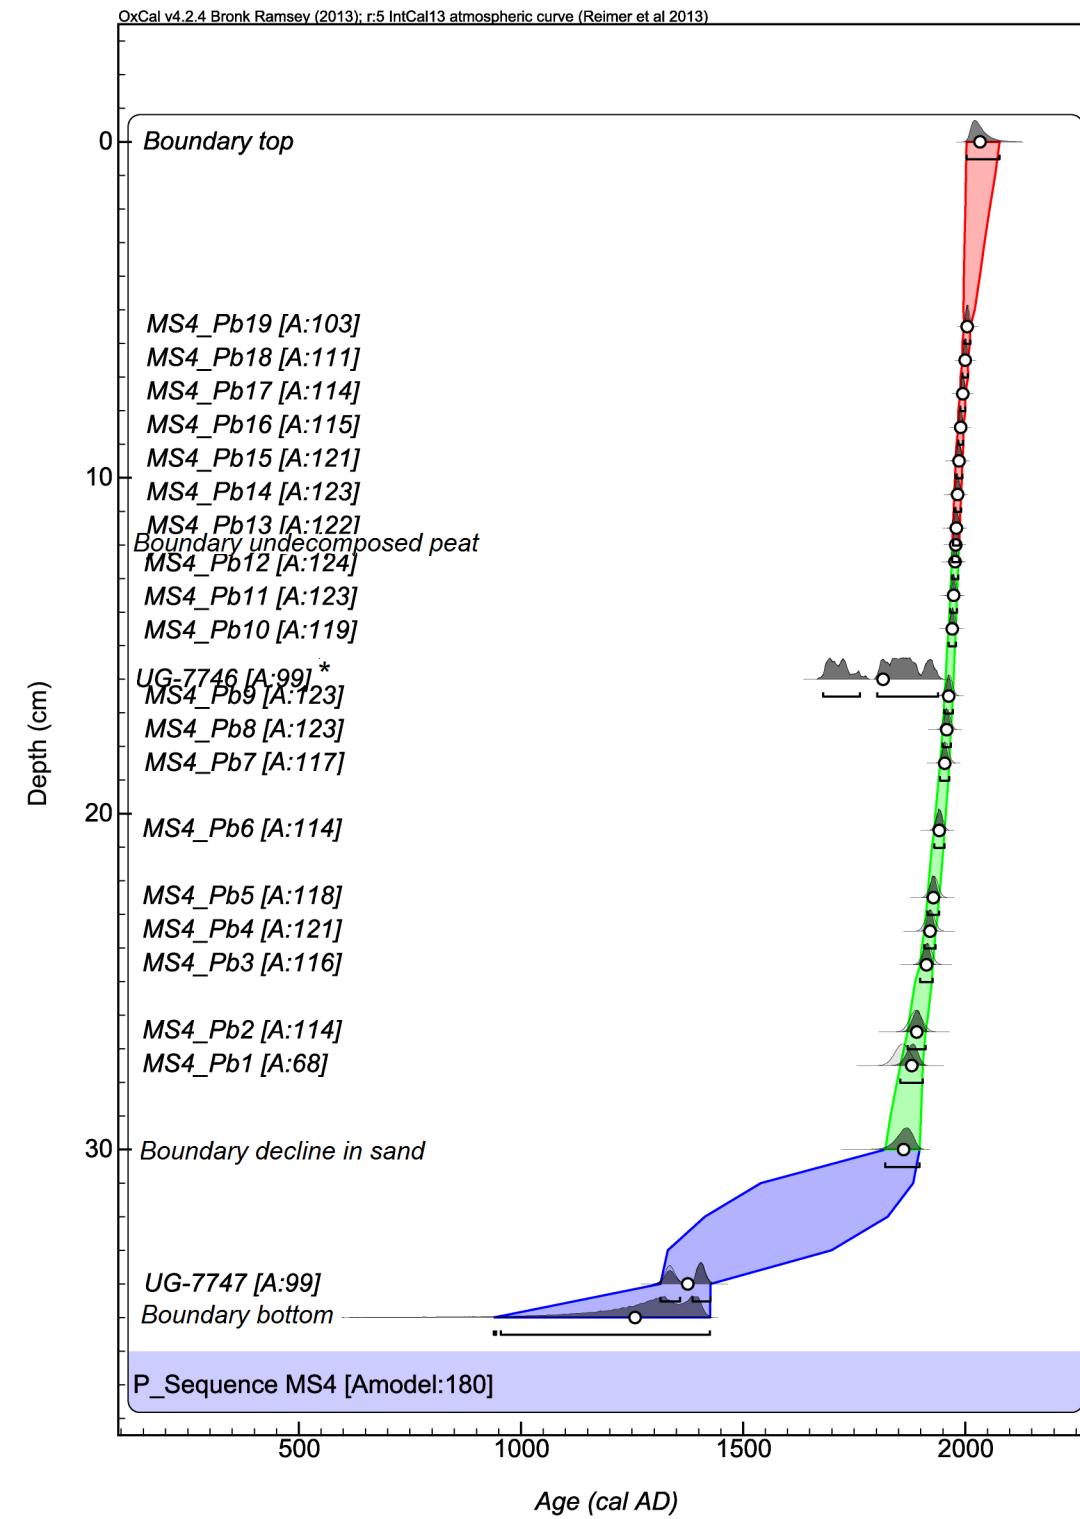

**MS15**

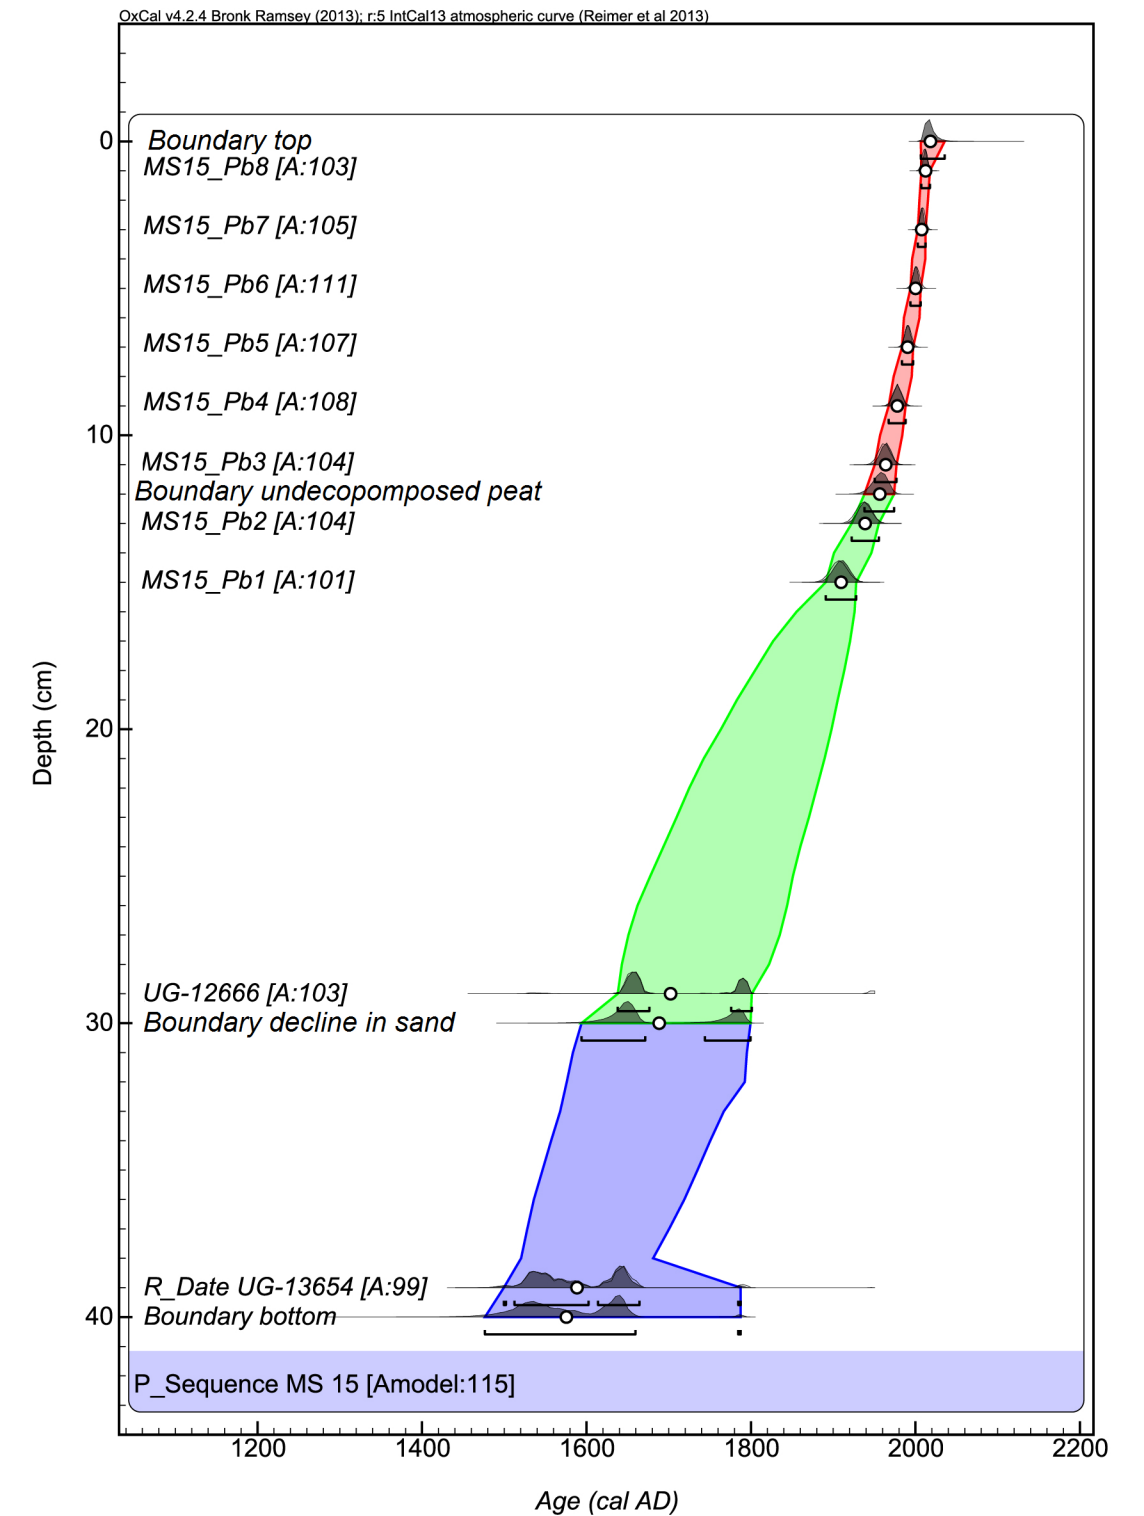

Supplement: 10113_2016_1033_MOESM3_ESM.pdf [file 10113_2016_1033_MOESM3_ESM.pdf]

# Resource 5

## Macrofossil profiles

### MS3

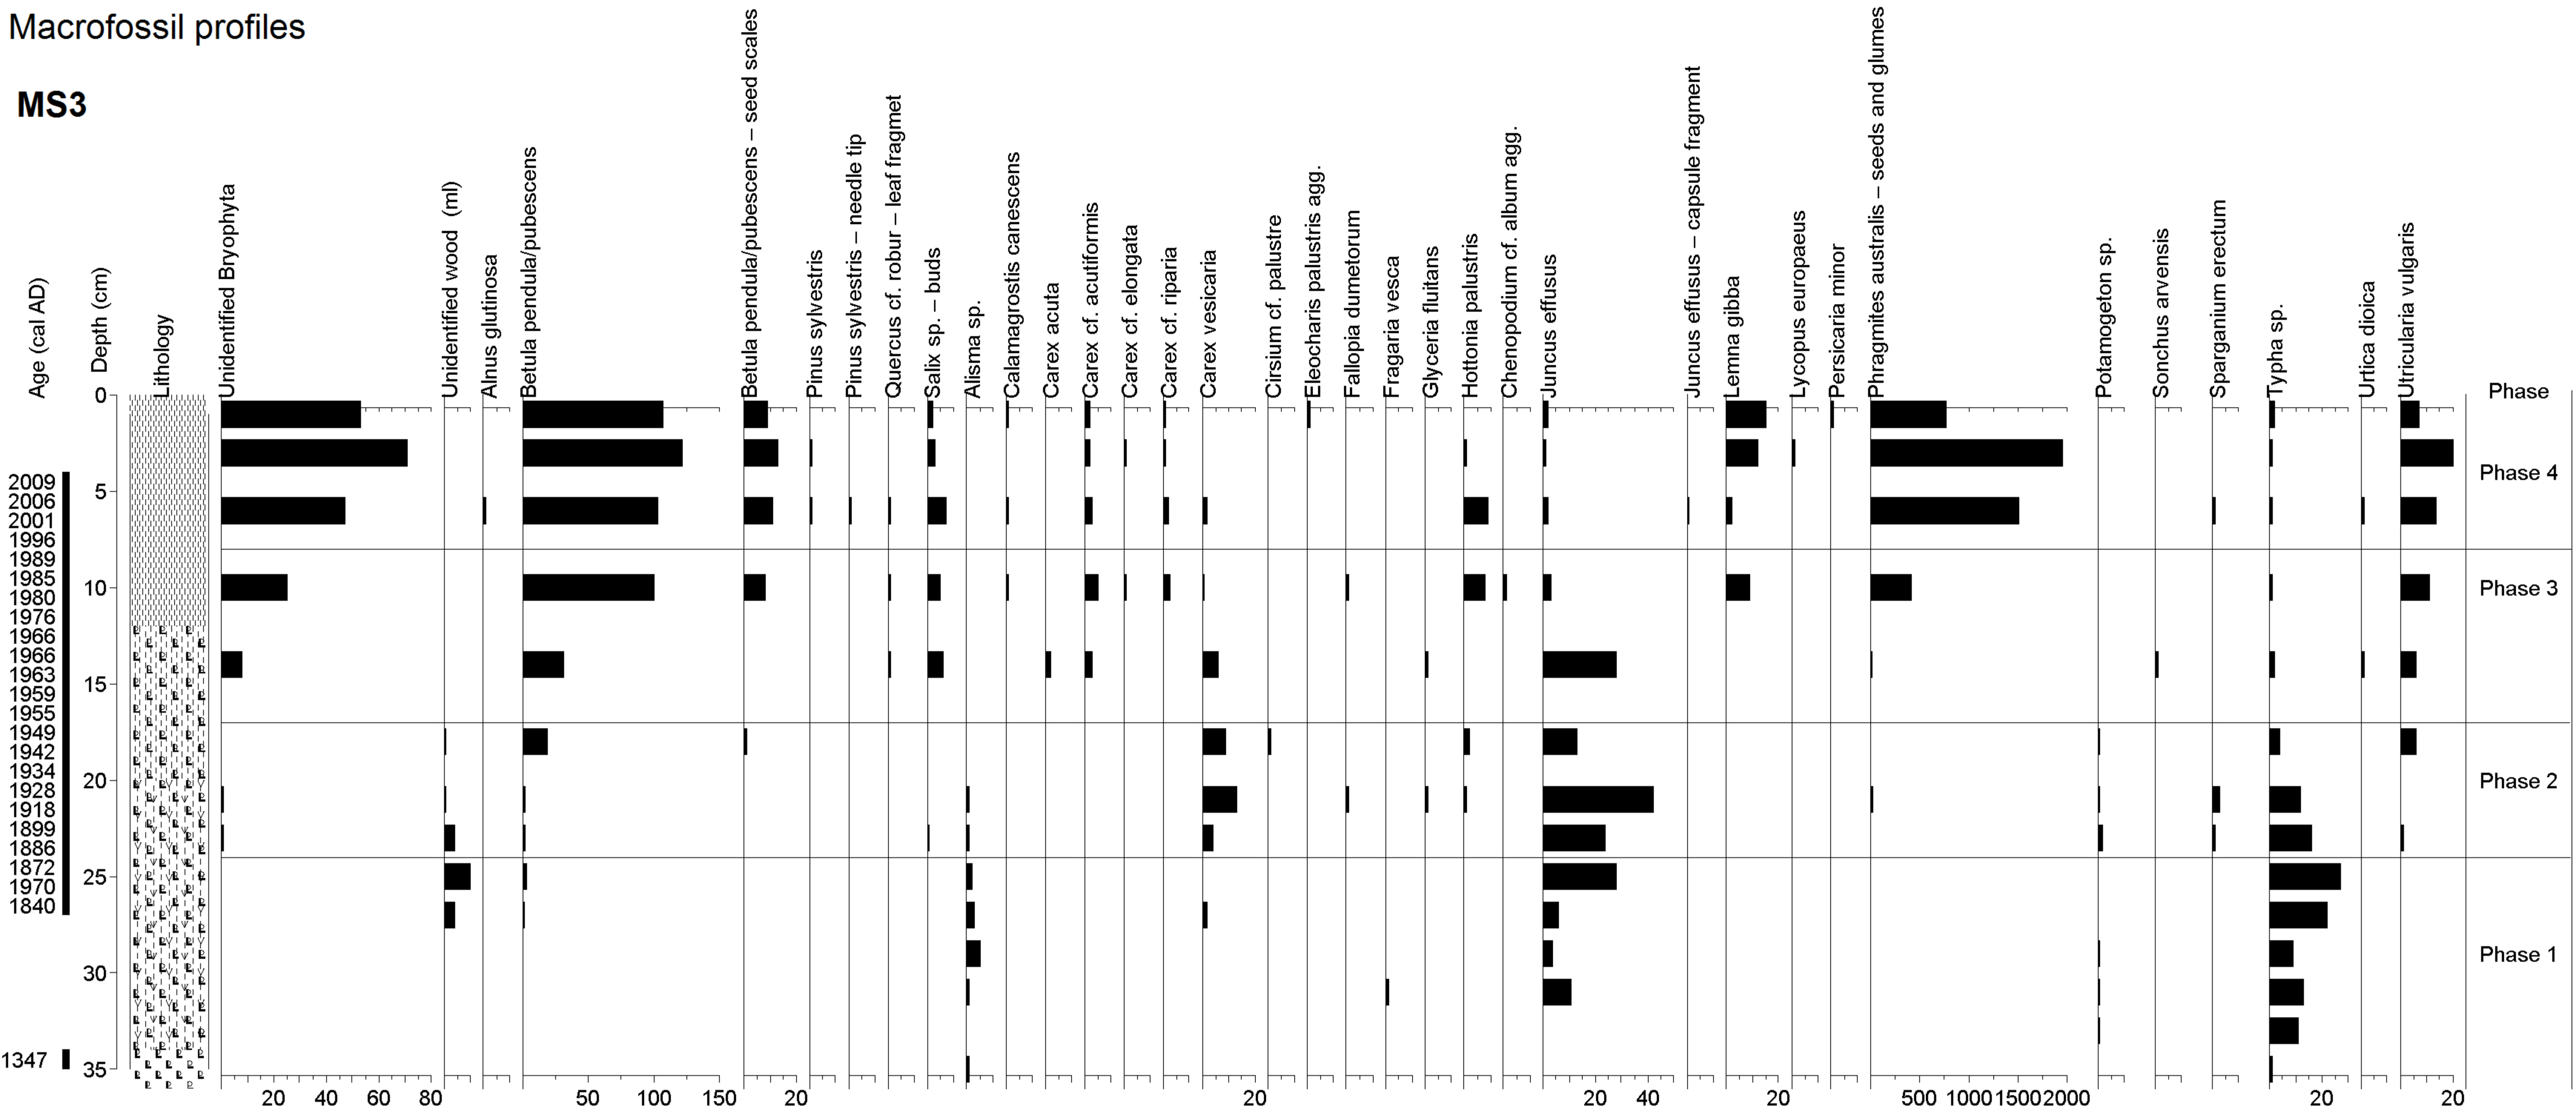

### MS4

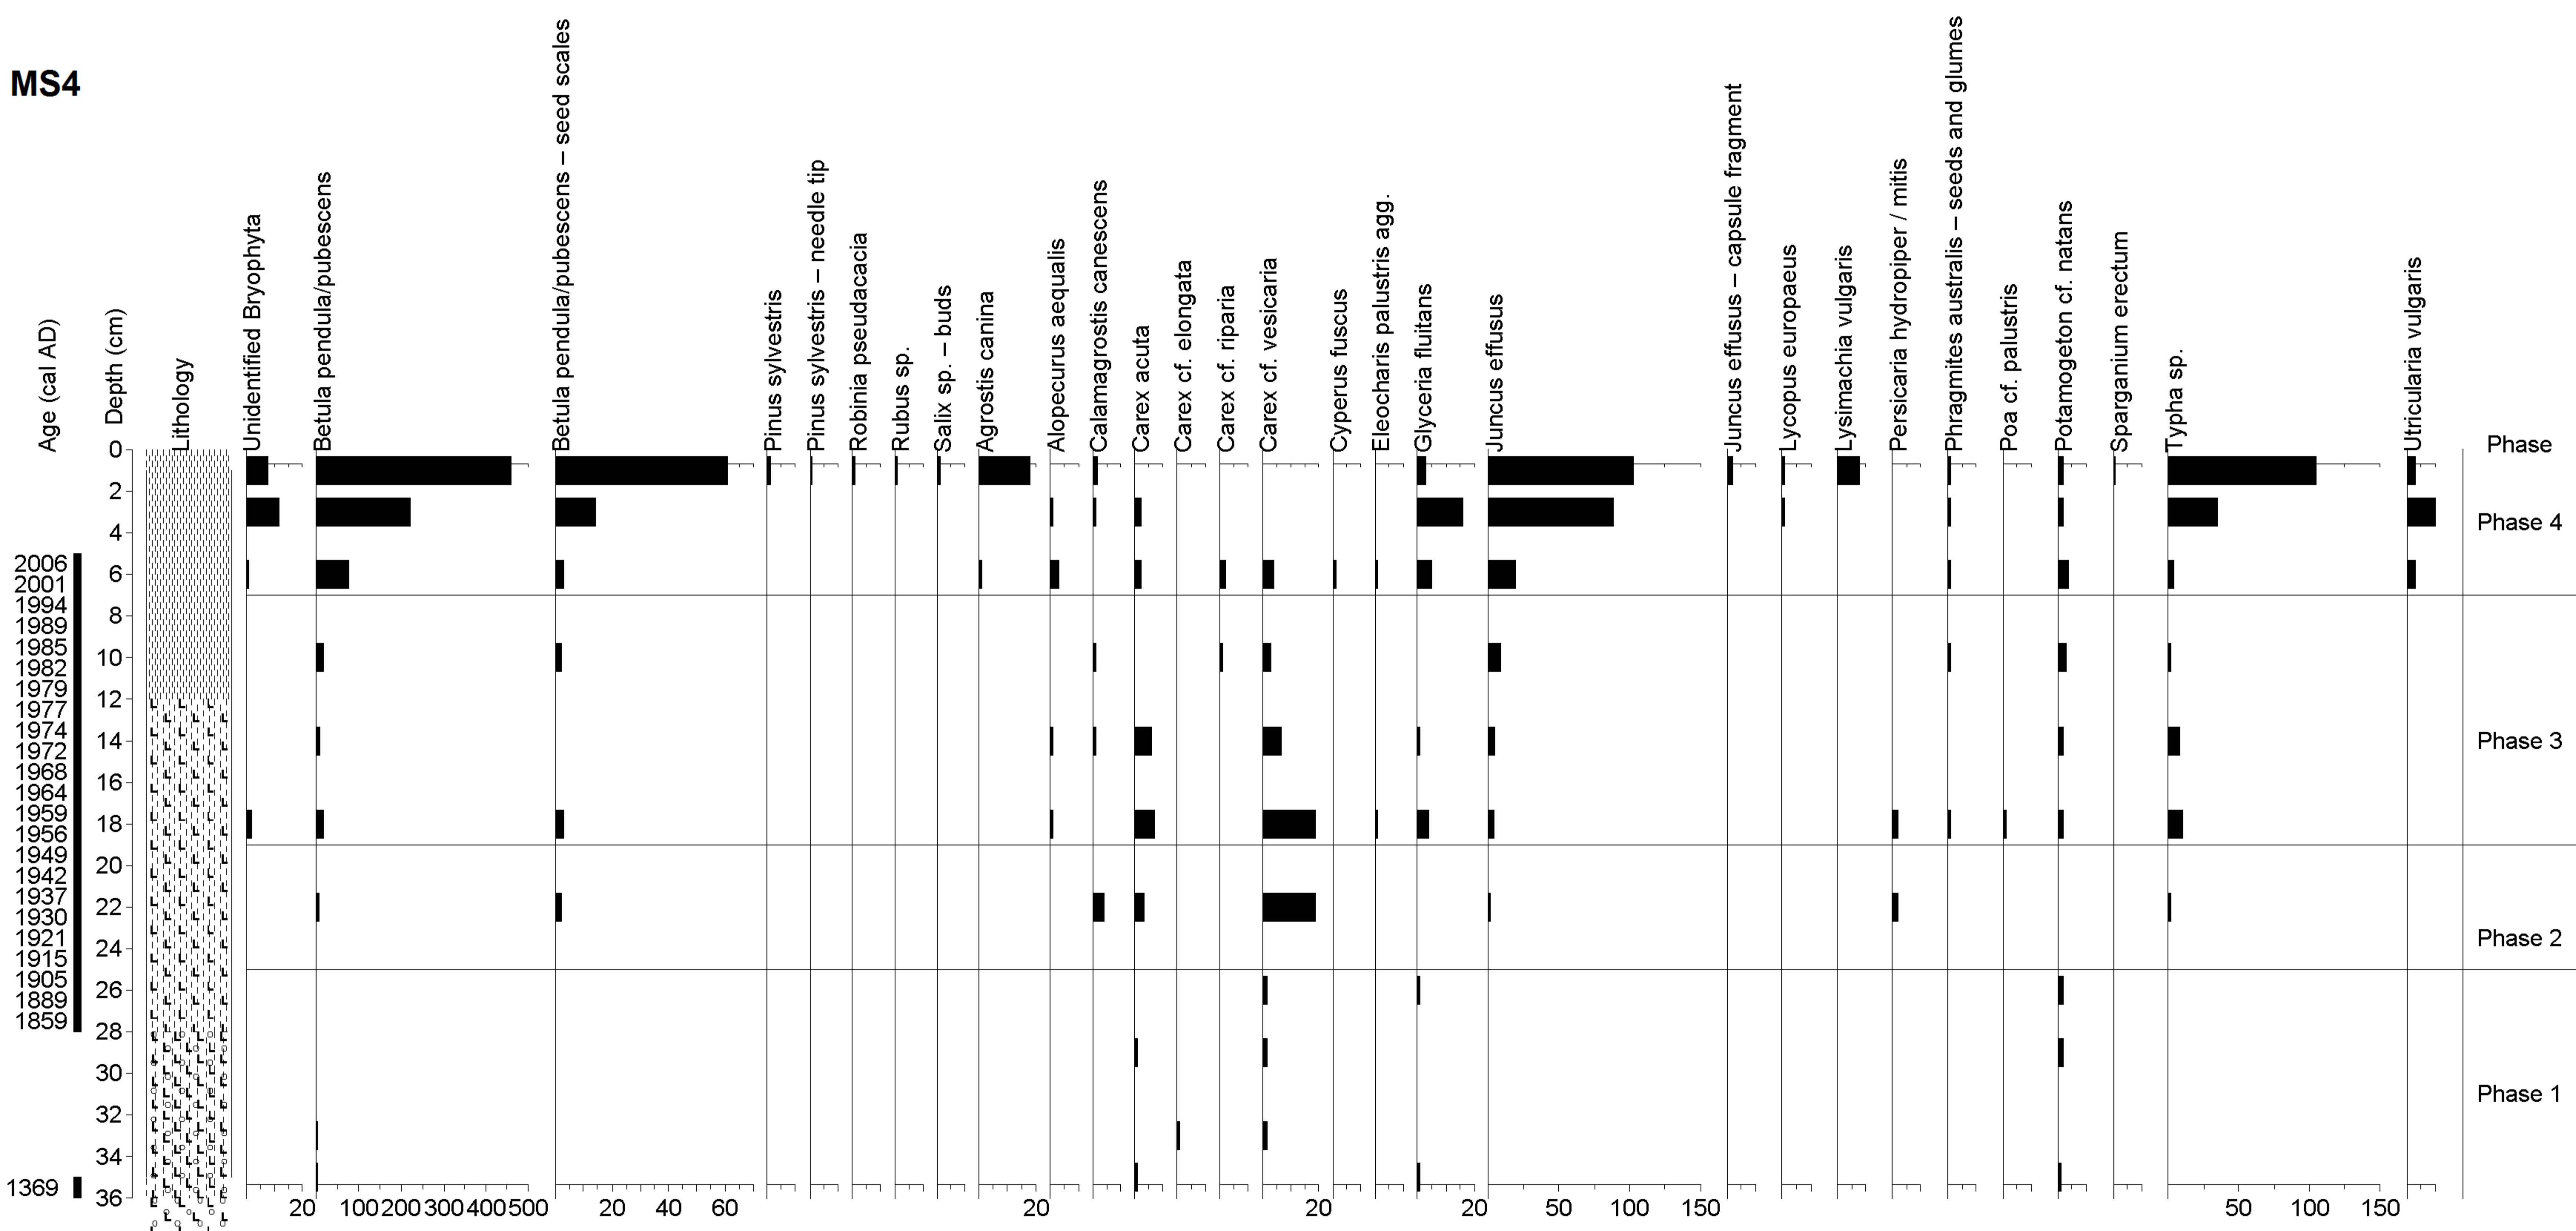

### MS15

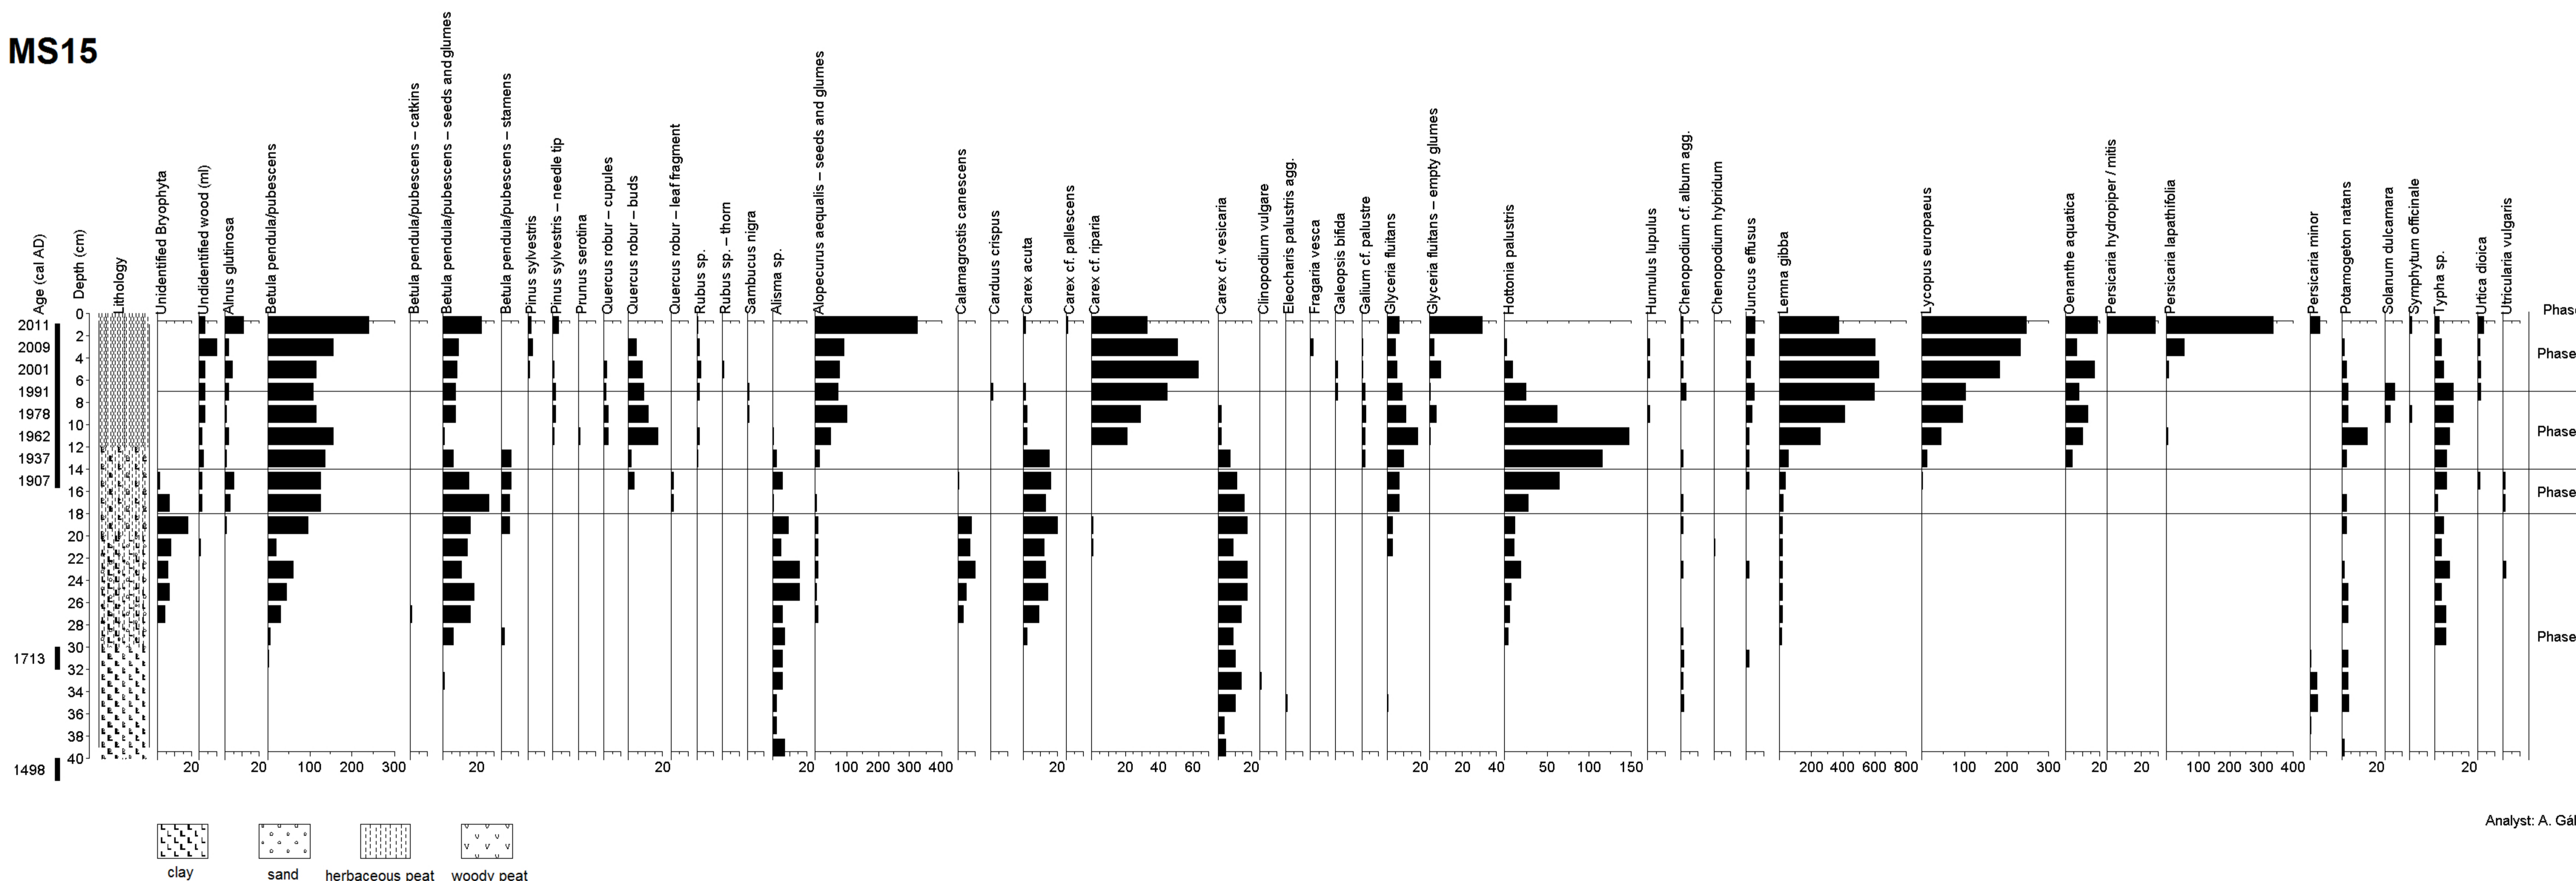

Supplement: 10113_2016_1033_MOESM5_ESM.pdf [file 10113_2016_1033_MOESM5_ESM.pdf]

Online Resource 6  
Pollen profiles

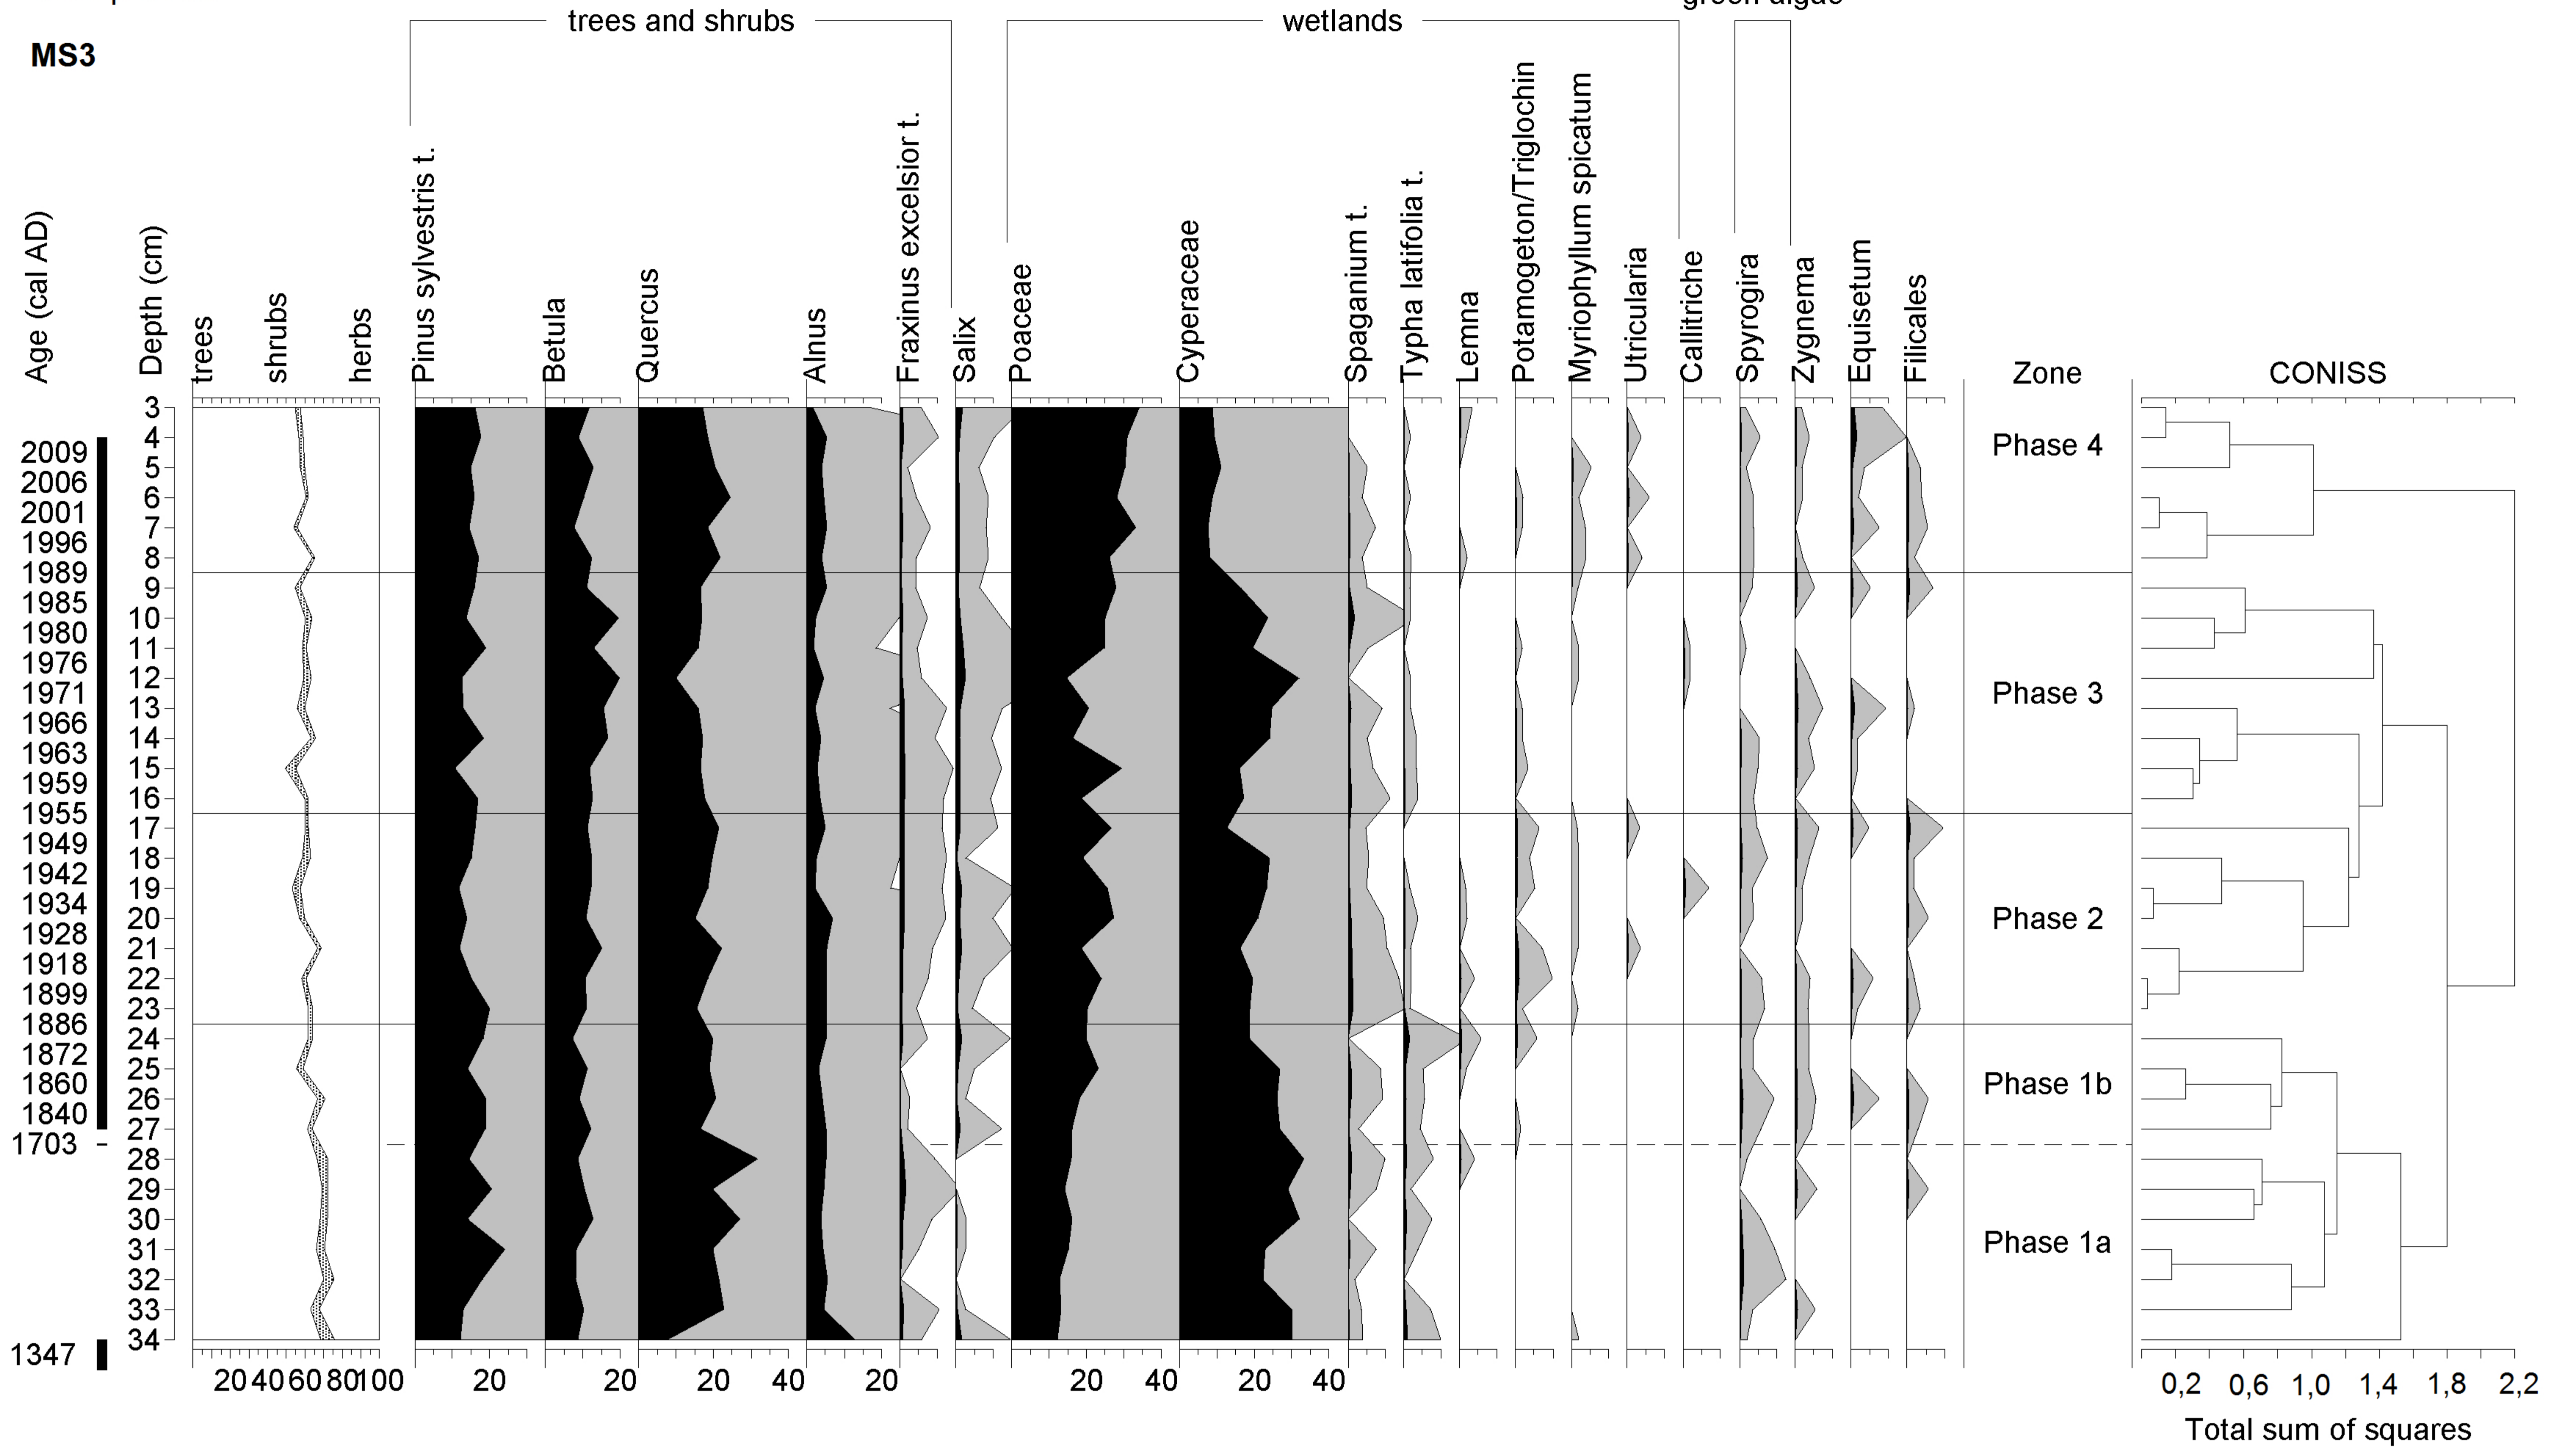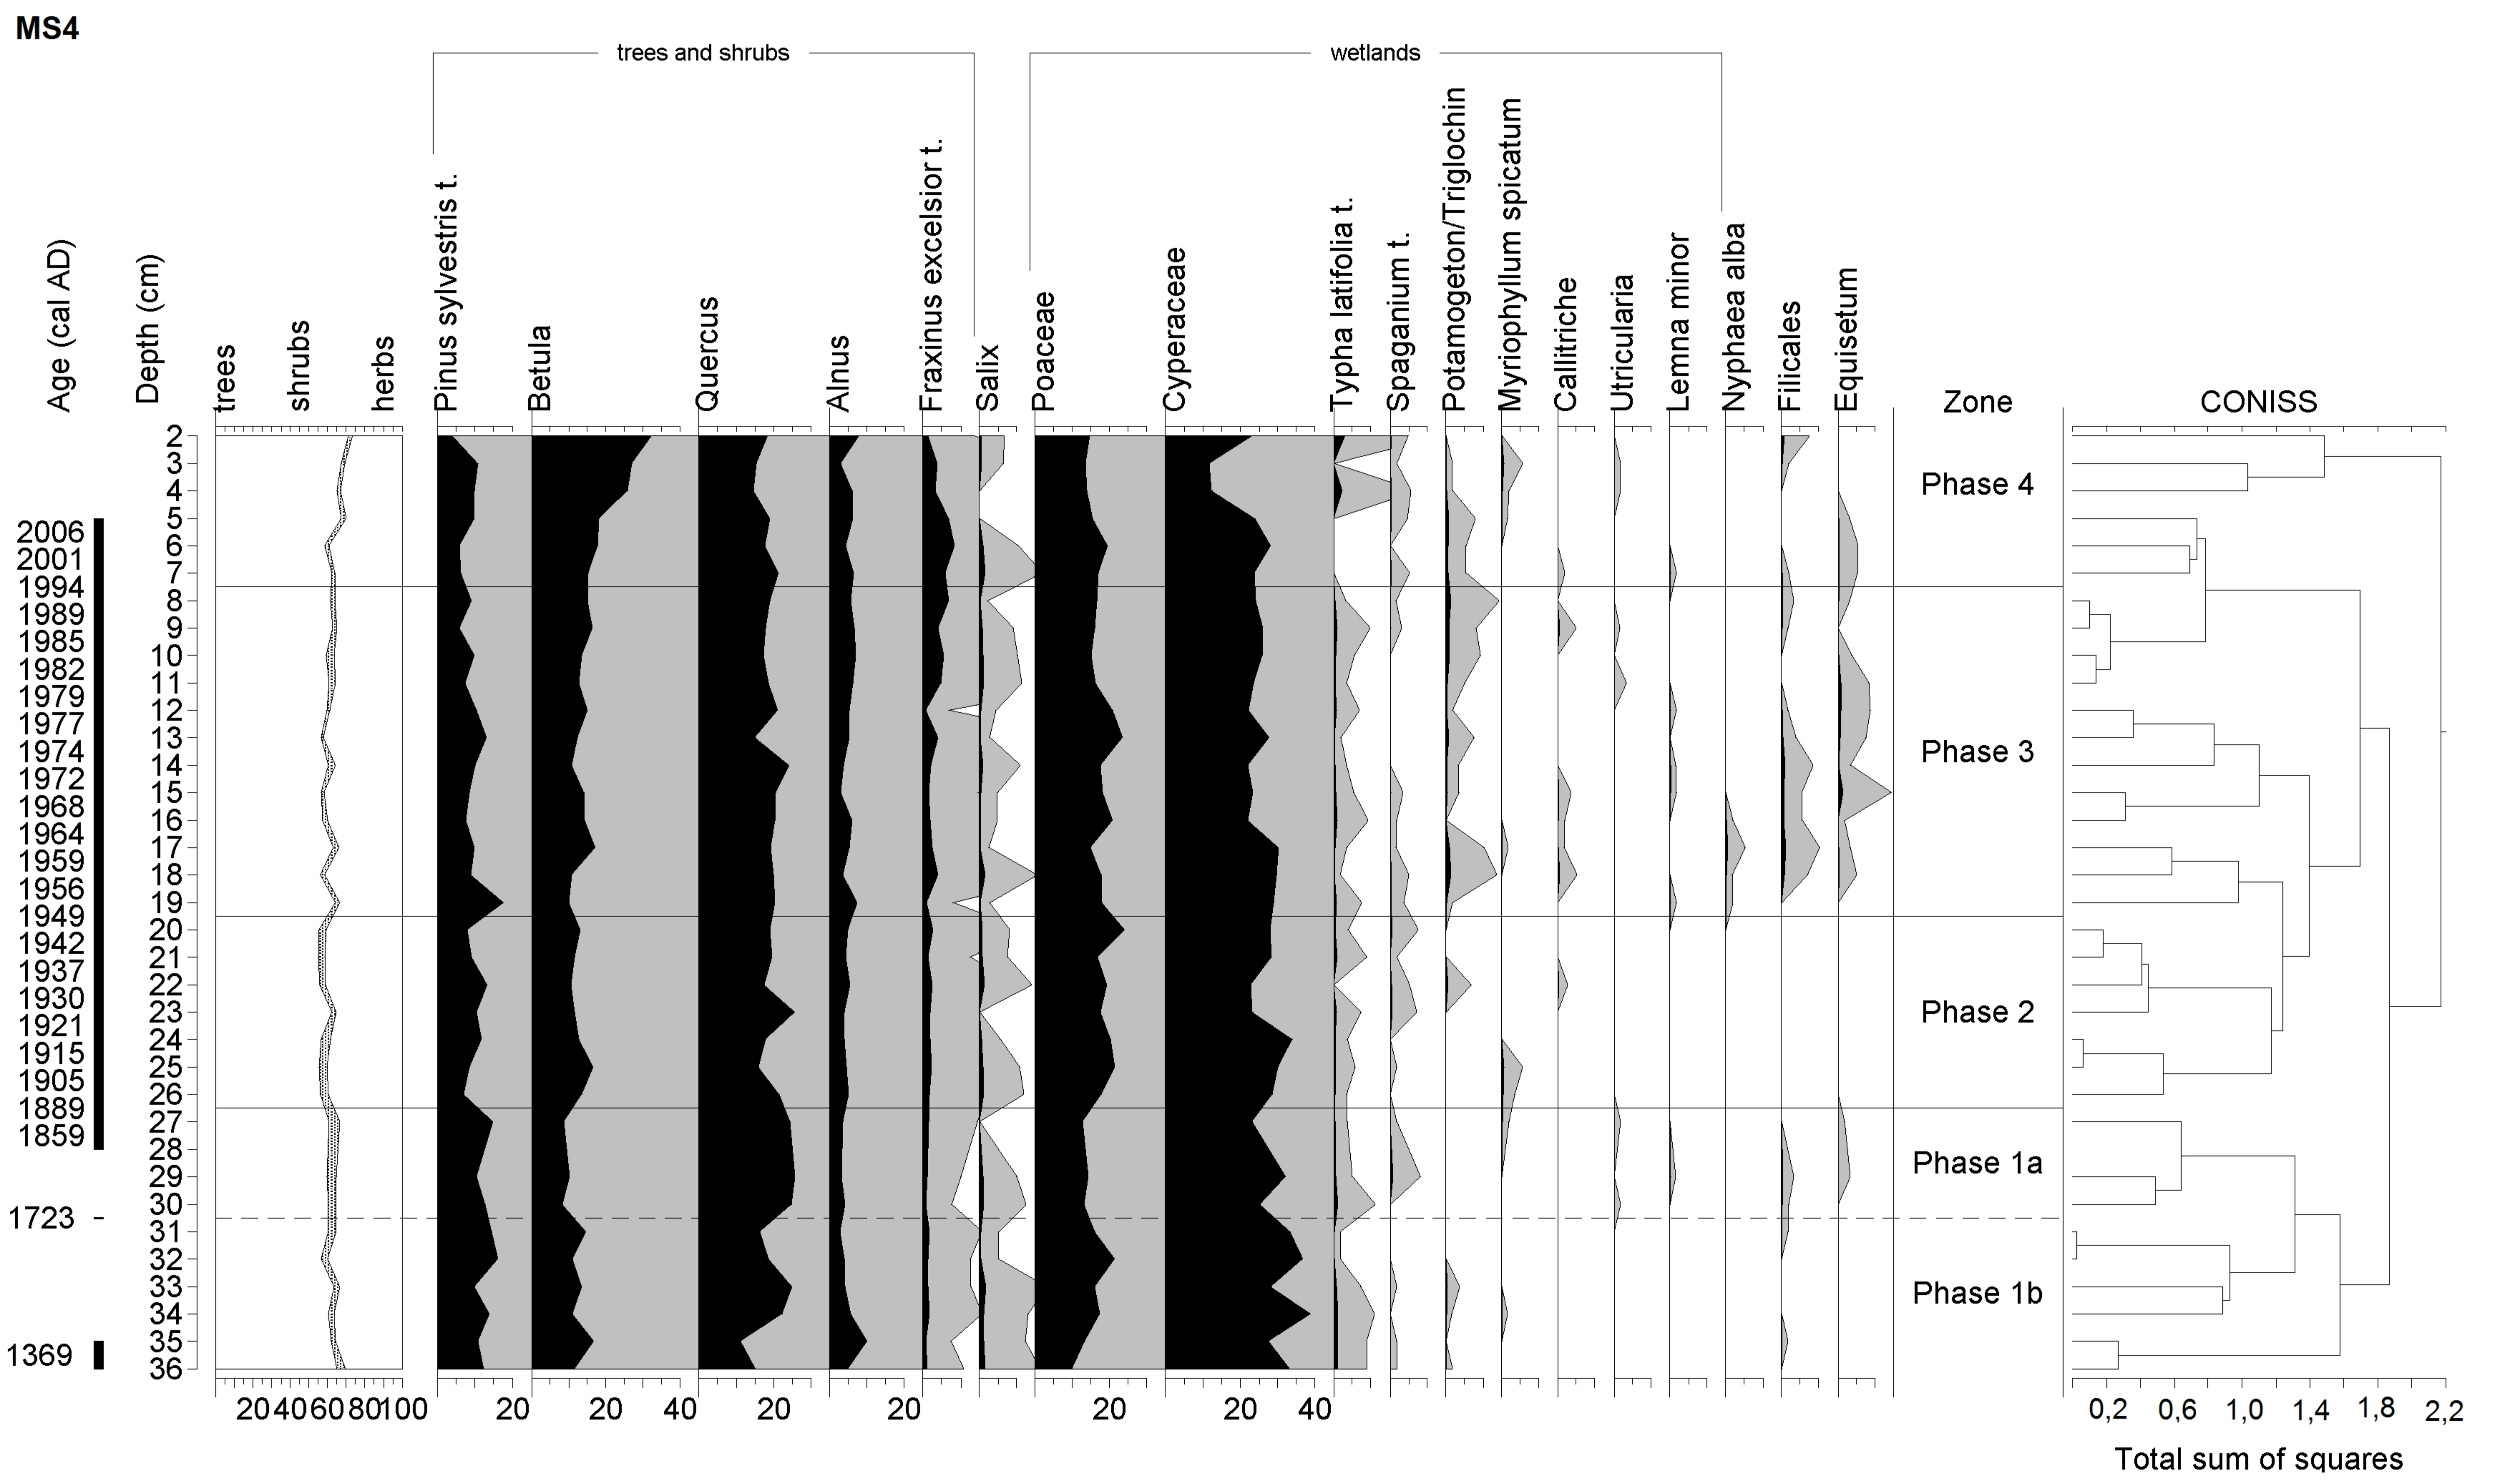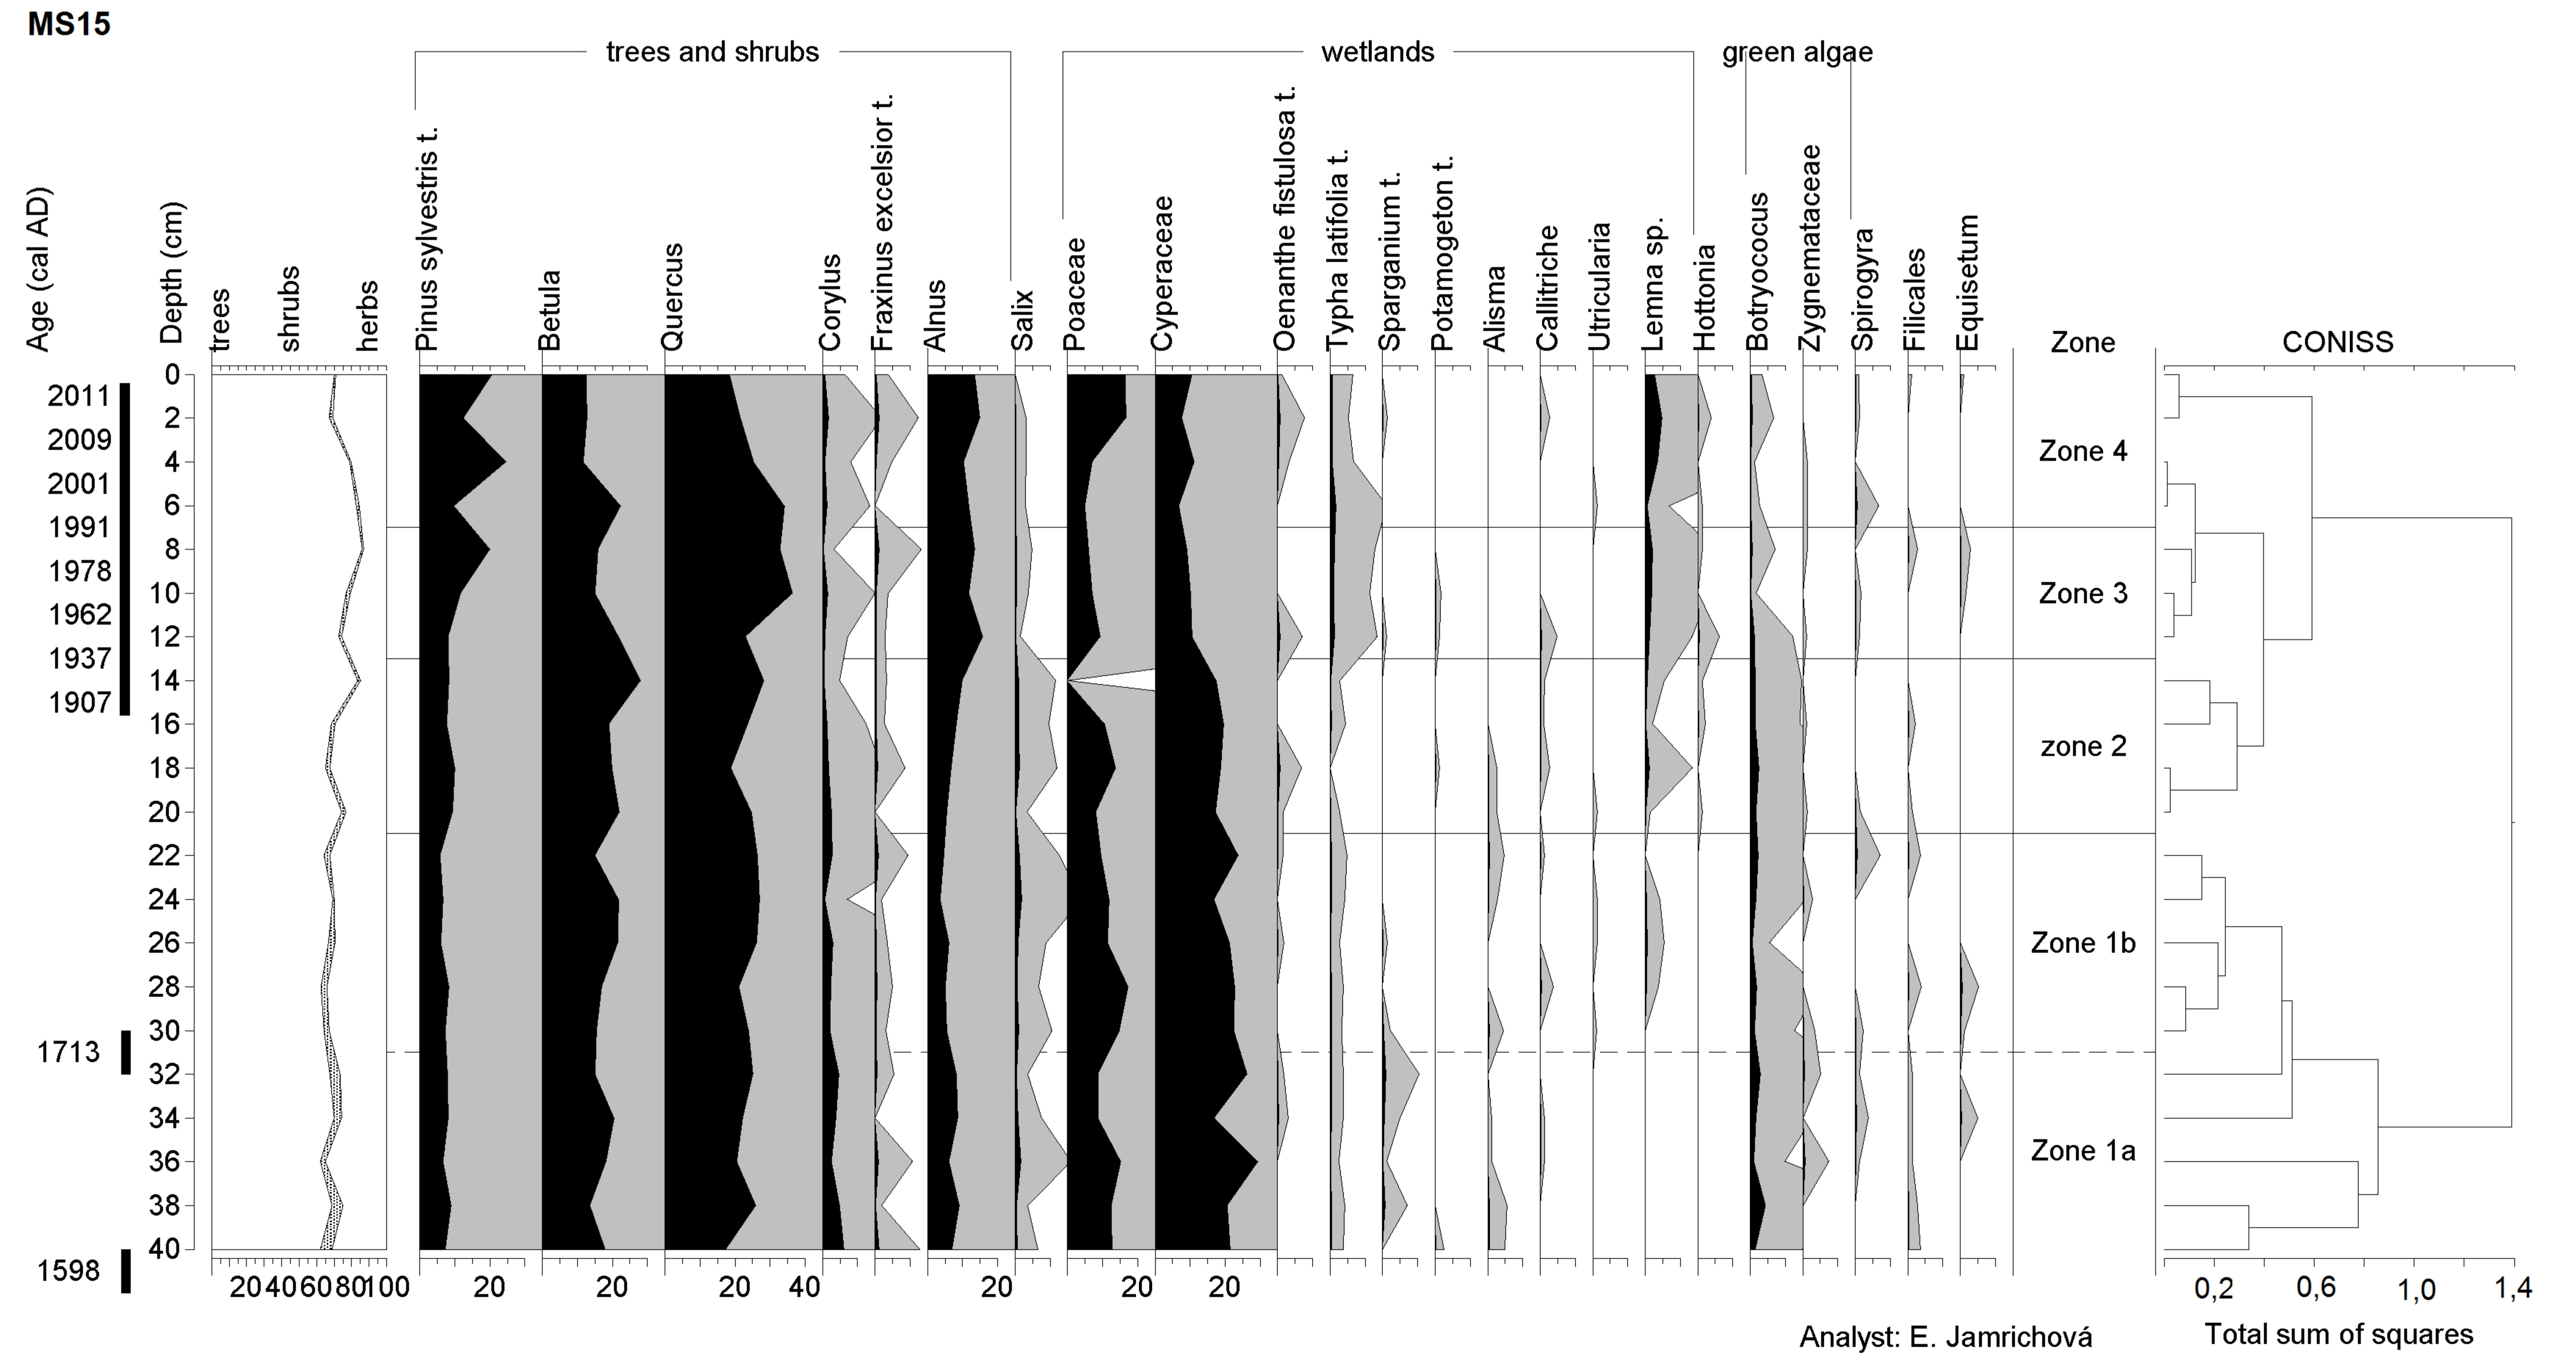

Supplement: 10113_2016_1033_MOESM6_ESM.pdf [file 10113_2016_1033_MOESM6_ESM.pdf]
